# Supplementary material for: Development of a Novel Covalently Bonded Conjugate of Caprylic Acid Tripeptide (Isoleucine–Leucine–Aspartic Acid) for Wound-Compatible and Injectable Hydrogel to Accelerate Healing
Source: MDPI journal article supplement (doi:10.3390/biom14010094), 2024-01-11
Supplement: s1 [file s1]

## Supplemental Figures

### Title: Development of a Novel Covalently Bonded Conjugate of Caprylic acid-Tripeptide (Isoleucine-Leucine-Aspartic Acid) for Wound-compatible and Injectable Hydrogel to Accelerate Healing

Sachin B. Baravkar<sup>1,\*</sup>, Yan Lu<sup>1,\*</sup>, Abdul-Razak Masoud<sup>1</sup>, Qi Zhao<sup>2</sup>, Jibao He<sup>3</sup>, Song Hong<sup>1,4,‡</sup>

<sup>1</sup> Neuroscience Center of Excellence, School of Medicine, L.S.U. Health, New Orleans, LA 70112, U.S.A.; ylu@lsuhsc.edu (Y.L.); amasou@lsuhsc.edu (A.-R.M.)

<sup>2</sup> NMR Laboratory, Department of Chemistry, Tulane University, New Orleans, LA 70115, U.S.A.; qzhao@tulane.edu

<sup>3</sup> Microscopy Laboratory, Tulane University, New Orleans, LA 70115, U.S.A.

<sup>4</sup> Department of Ophthalmology, School of Medicine, L.S.U. Health, New Orleans, LA 70112, U.S.A.

\*These authors contributed equally to this work and share first authorship

‡ Corresponding author: Song Hong, PhD, email: shong@lsuhsc.edu; Tel: 504 605 9013

#### Figures S1 to S27. <sup>1</sup>H, <sup>13</sup>C, and <sup>13</sup>C DEPT 135 NMR spectra of compounds 6-14.

| Figure number   | NMR spectra of compound #                                                                        | Page number |
|-----------------|--------------------------------------------------------------------------------------------------|-------------|
| Figures S1-S3   | <sup>1</sup> H, <sup>13</sup> C, and <sup>13</sup> C DEPT 135 NMR spectra for compound <b>6</b>  | S2-S3       |
| Figures S4-S6   | <sup>1</sup> H, <sup>13</sup> C, and <sup>13</sup> C DEPT 135 NMR spectra for compound <b>7</b>  | S3-S4       |
| Figures S7-S9   | <sup>1</sup> H, <sup>13</sup> C, and <sup>13</sup> C DEPT 135 NMR spectra for compound <b>8</b>  | S5-S6       |
| Figures S10-S12 | <sup>1</sup> H, <sup>13</sup> C, and <sup>13</sup> C DEPT 135 NMR spectra for compound <b>9</b>  | S6-S7       |
| Figures S13-S15 | <sup>1</sup> H, <sup>13</sup> C, and <sup>13</sup> C DEPT 135 NMR spectra for compound <b>10</b> | S8-S9       |
| Figures S16-S18 | <sup>1</sup> H, <sup>13</sup> C, and <sup>13</sup> C DEPT 135 NMR spectra for compound <b>11</b> | S9-S10      |
| Figures S19-S21 | <sup>1</sup> H, <sup>13</sup> C, and <sup>13</sup> C DEPT 135 NMR spectra for compound <b>12</b> | S11-S12     |
| Figures S22-S24 | <sup>1</sup> H, <sup>13</sup> C, and <sup>13</sup> C DEPT 135 NMR spectra for compound <b>13</b> | S12-S13     |
| Figures S25-S27 | <sup>1</sup> H, <sup>13</sup> C, and <sup>13</sup> C DEPT 135 NMR spectra for compound <b>14</b> | S14-S15     |

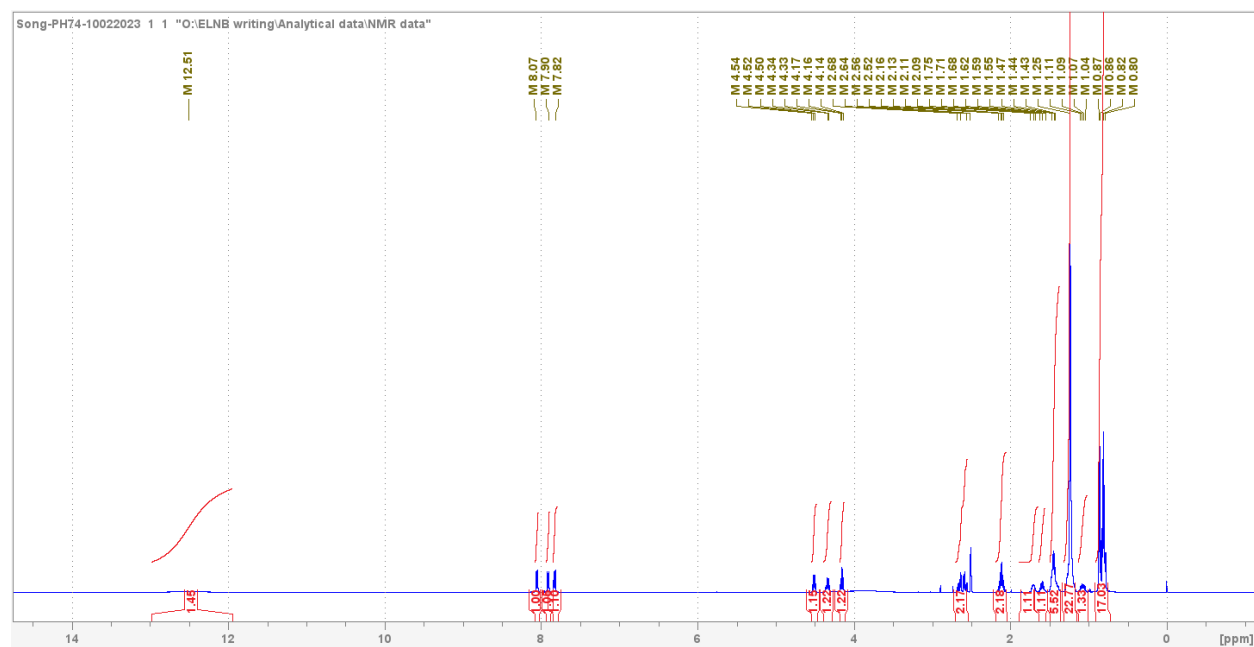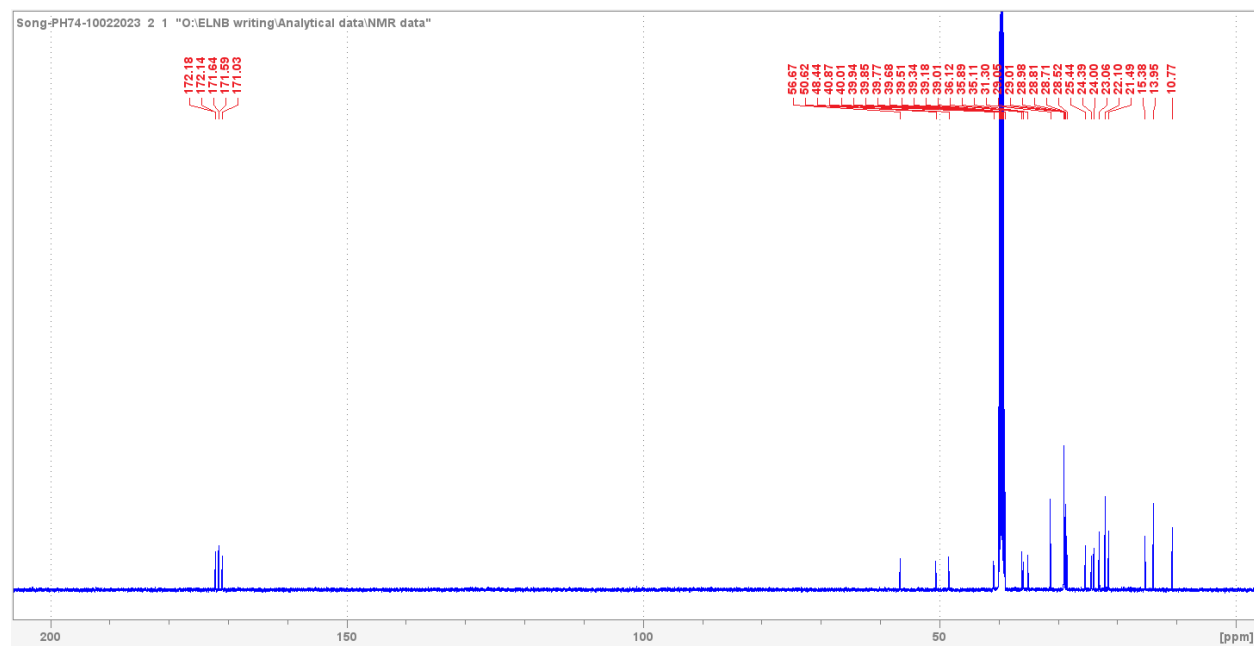

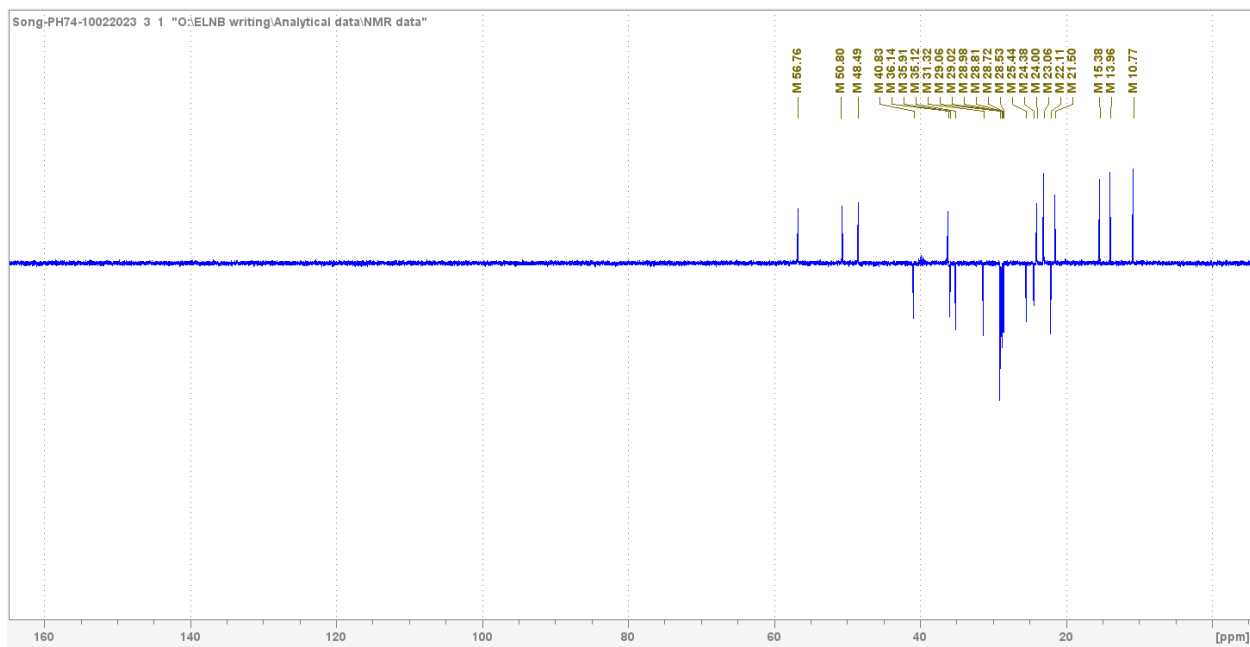

**Figure S3:**  $^{13}\text{C}$  DEPT NMR of compound **6** in DMSO- $d_6$ .

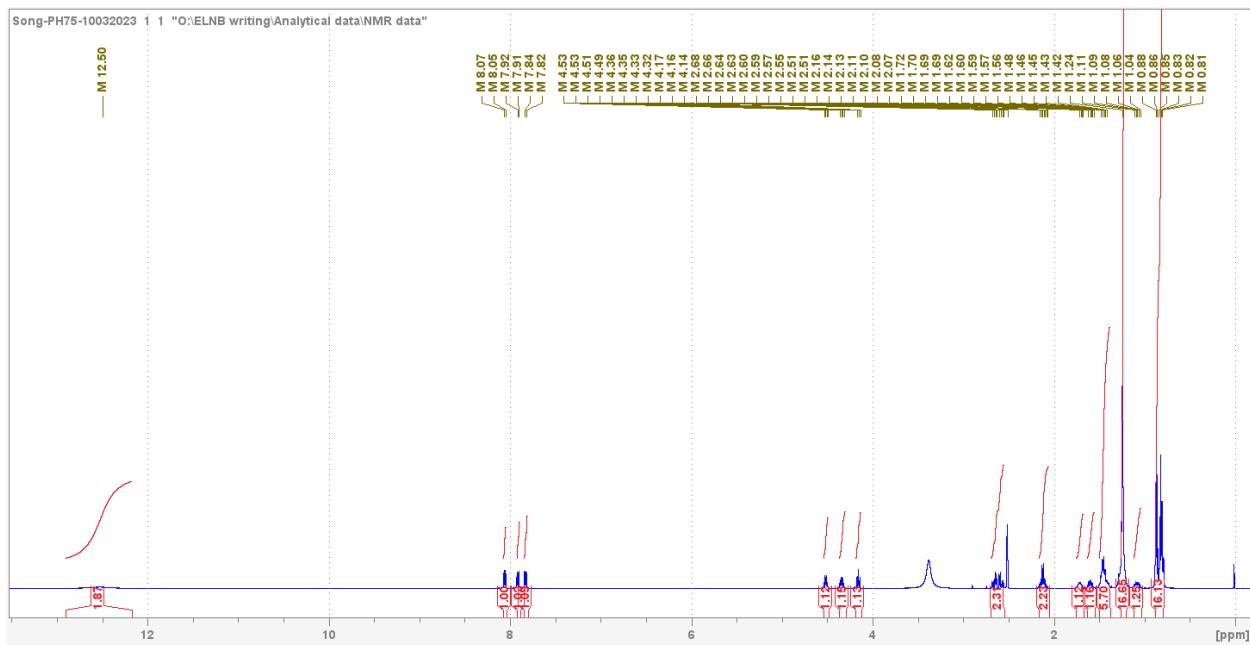

**Figure S4:**  $^1\text{H}$  NMR of compound **7** in DMSO- $d_6$ .

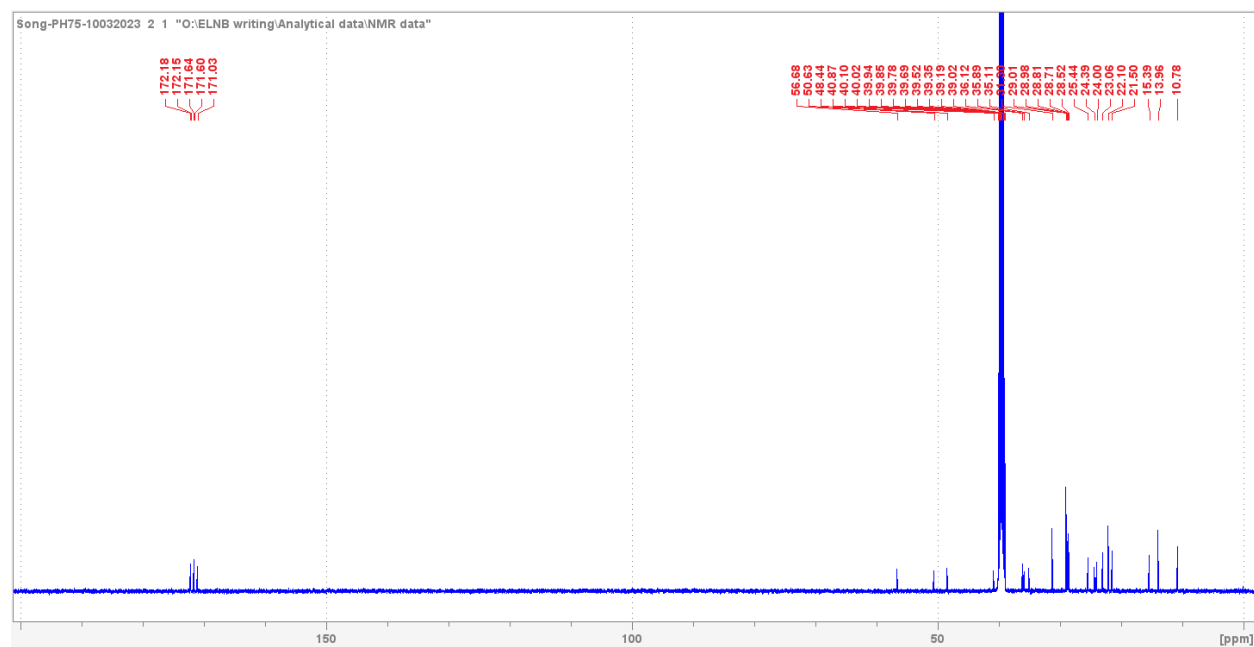

**Figure S5:**  $^{13}\text{C}$  NMR of compound **7** in DMSO- $d_6$ .

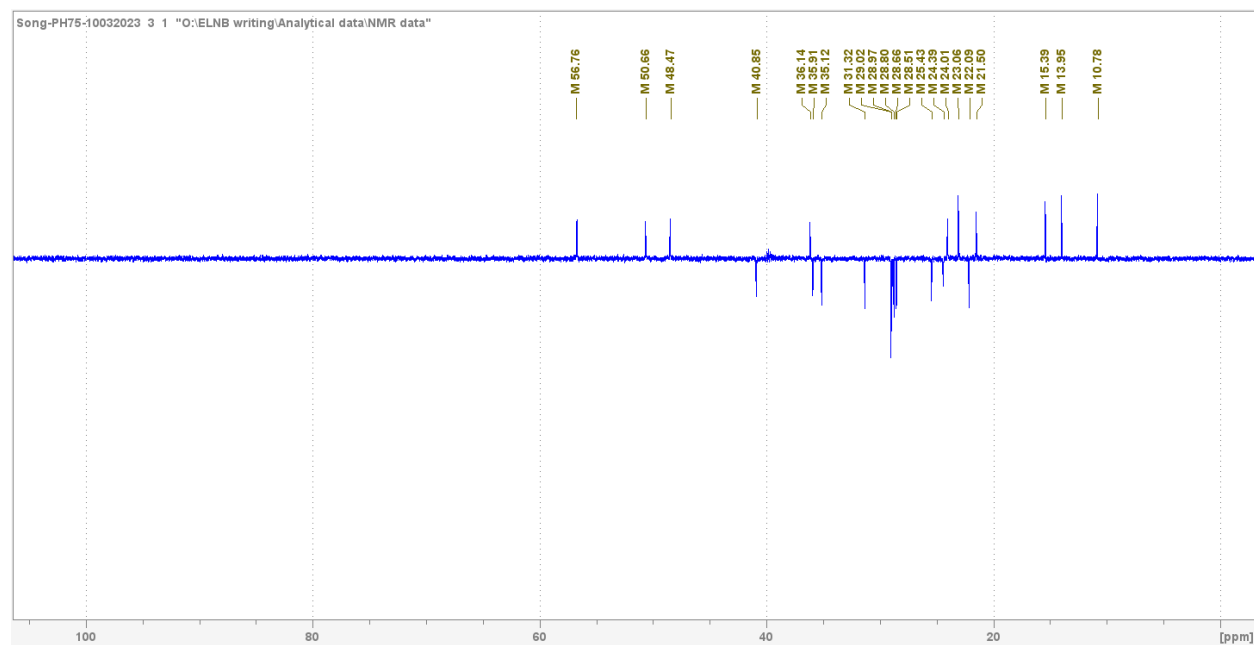

**Figure S6:**  $^{13}\text{C}$  DEPT NMR of compound **7** in DMSO- $d_6$ .

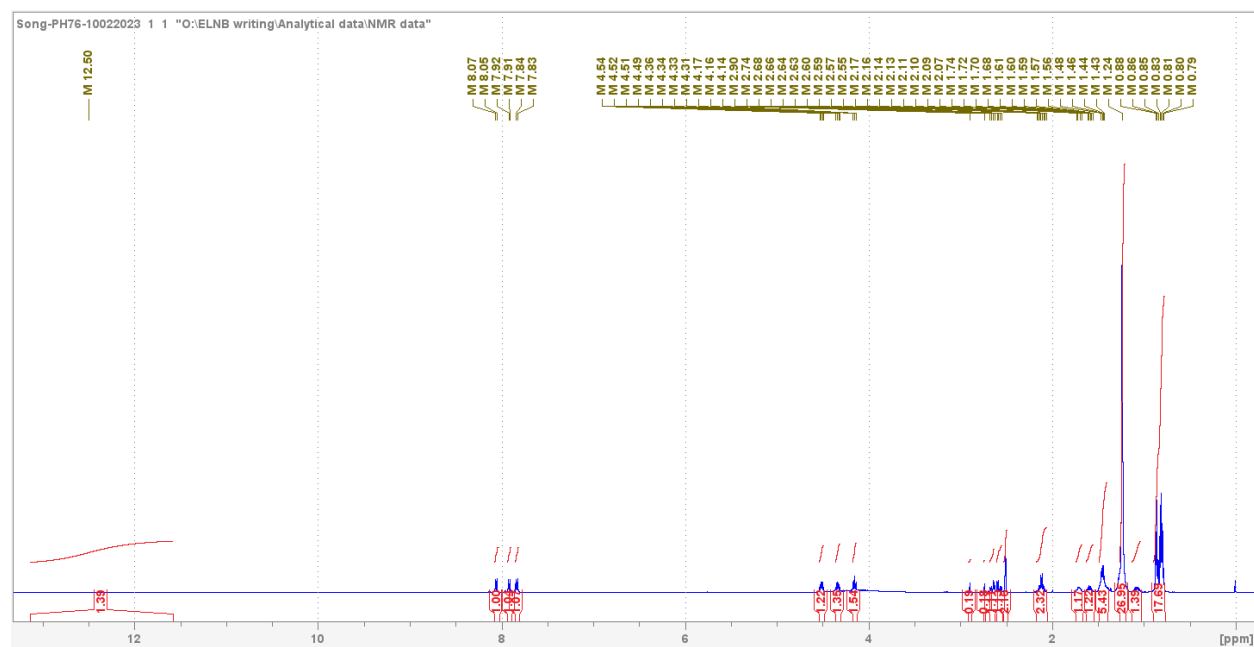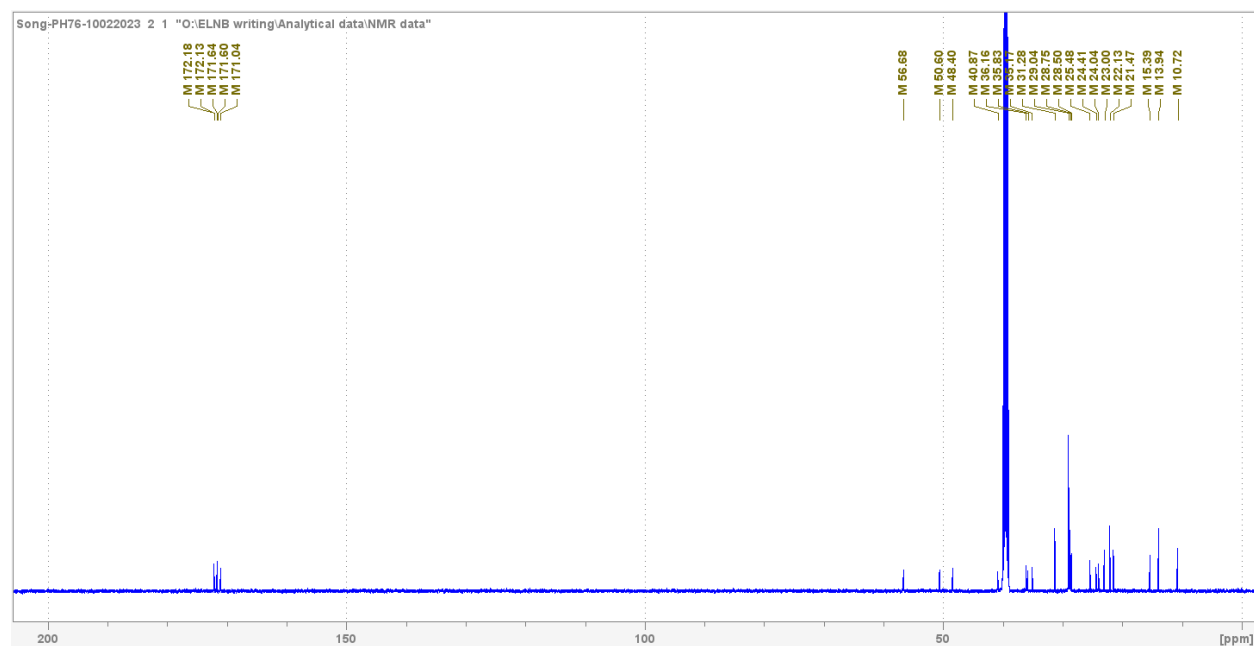

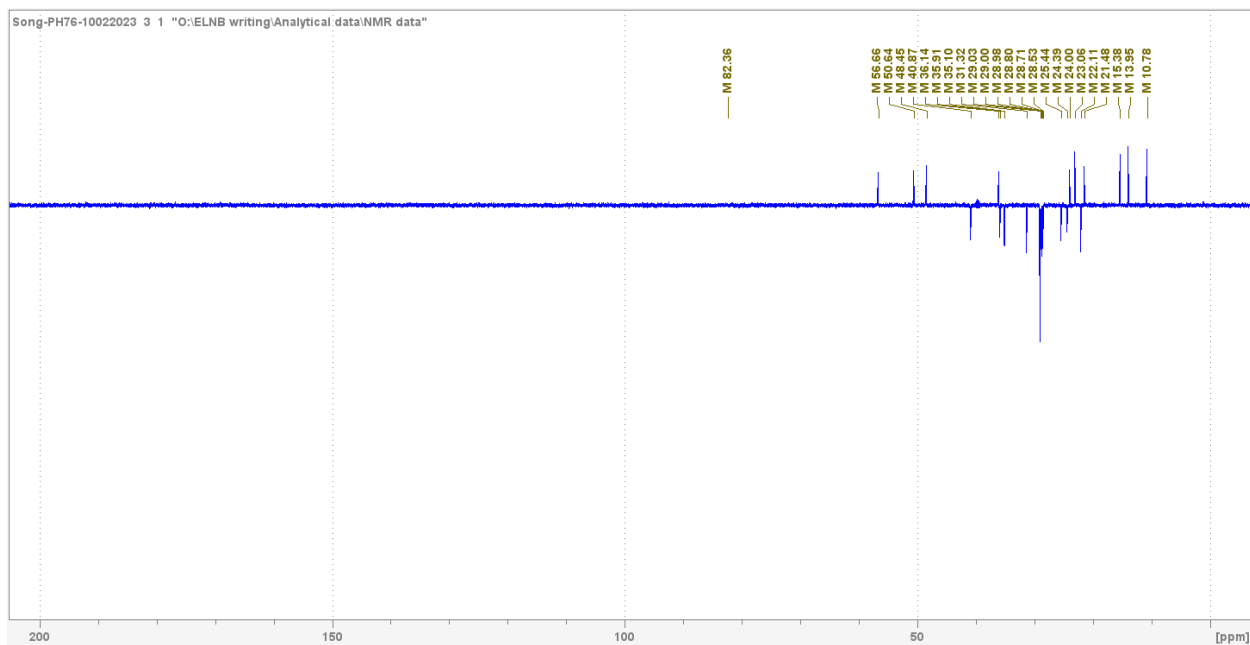

**Figure S9:**  $^{13}\text{C}$  DEPT NMR of compound **8** in DMSO- $d_6$ .

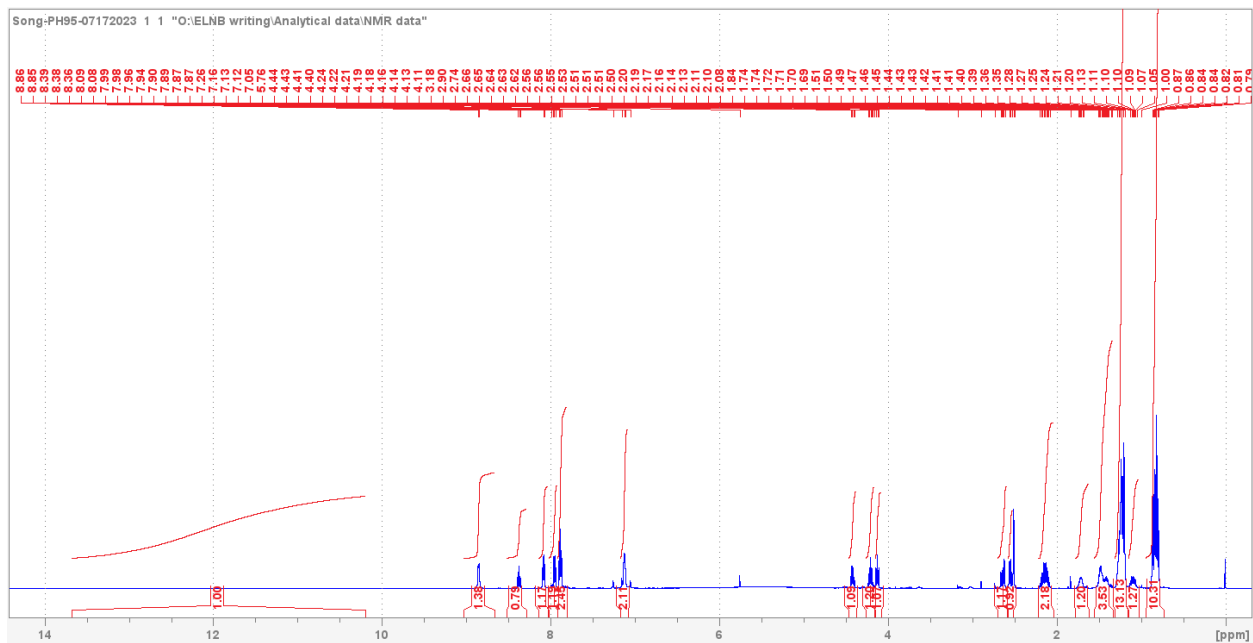

**Figure S10:**  $^1\text{H}$  NMR of compound **9** in DMSO- $d_6$ .

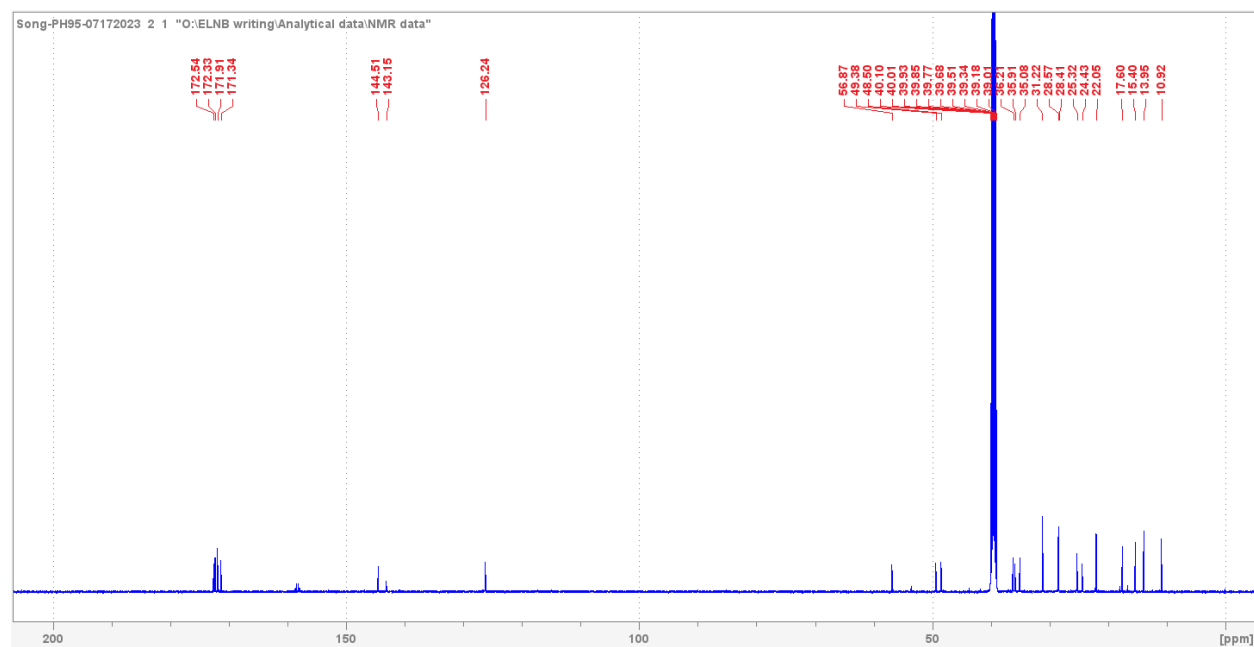

**Figure S11:**  $^{13}\text{C}$  NMR of compound **9** in DMSO- $d_6$ .

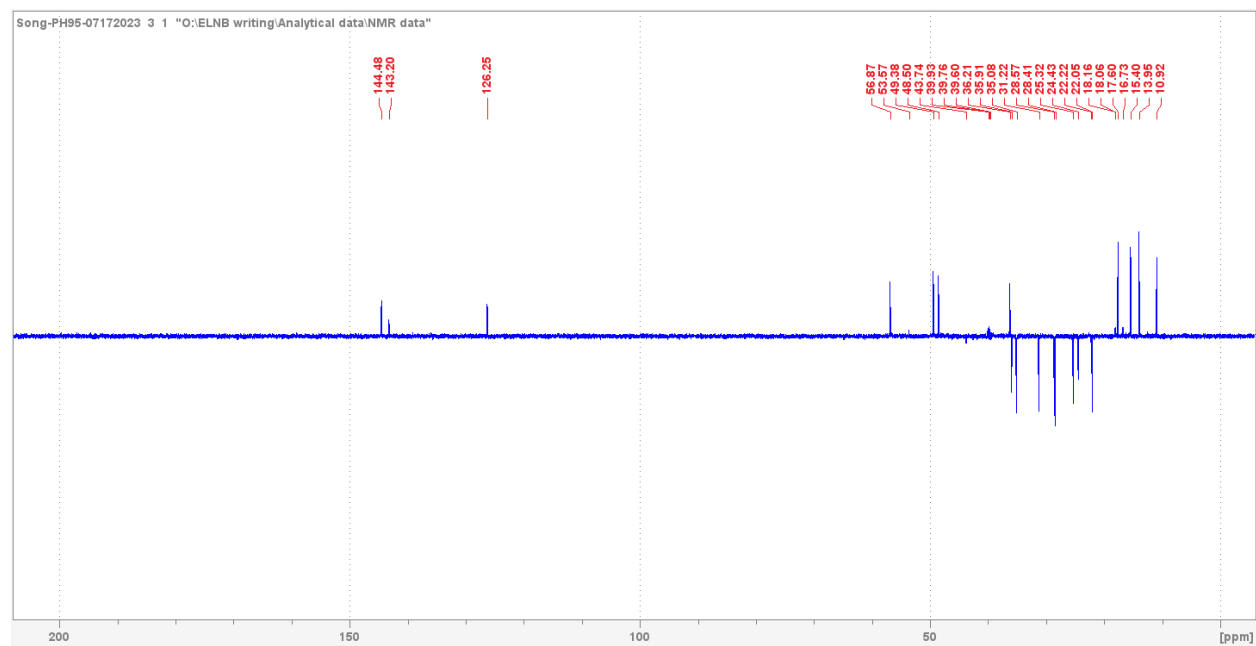

**Figure S12:**  $^{13}\text{C}$  DEPT NMR of compound **9** in DMSO- $d_6$ .





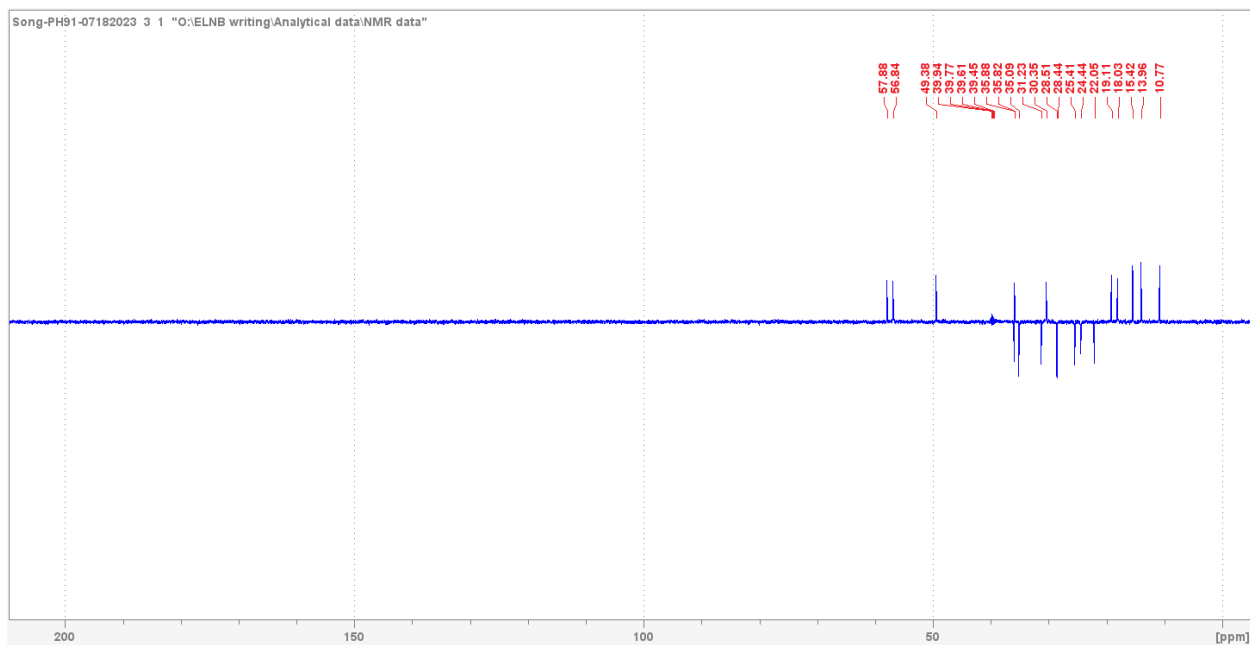

**Figure S15:**  $^{13}\text{C}$  DEPT NMR of compound **10** in DMSO- $d_6$ .

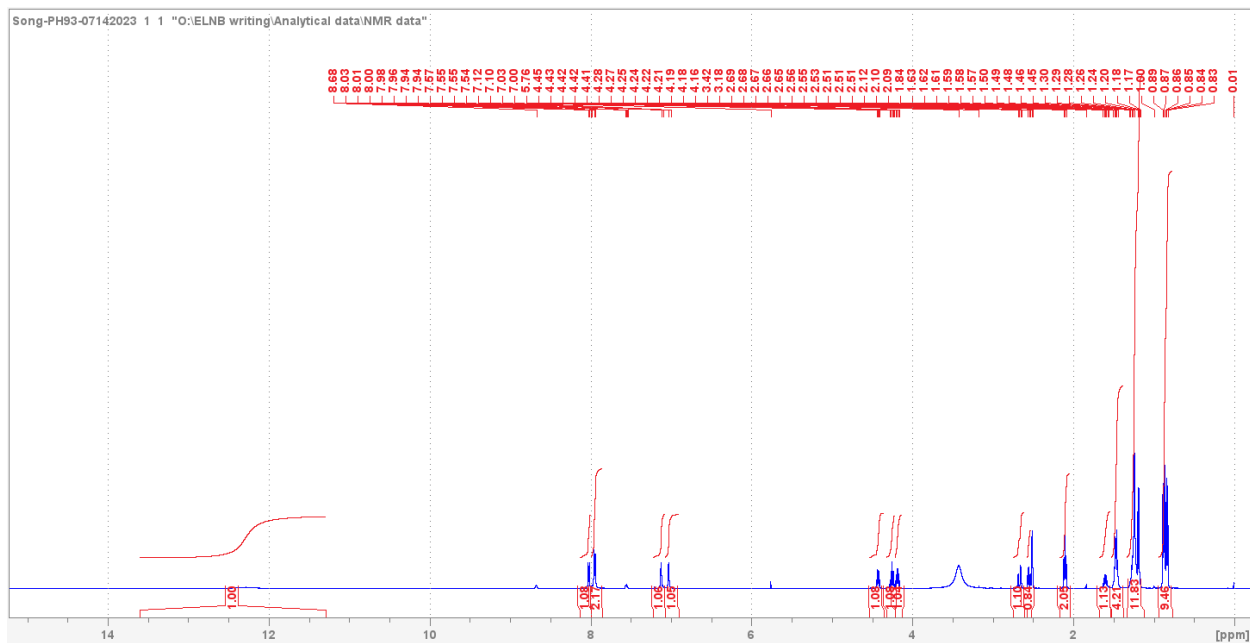

**Figure S16:**  $^1\text{H}$  NMR of compound **11** in DMSO- $d_6$ .

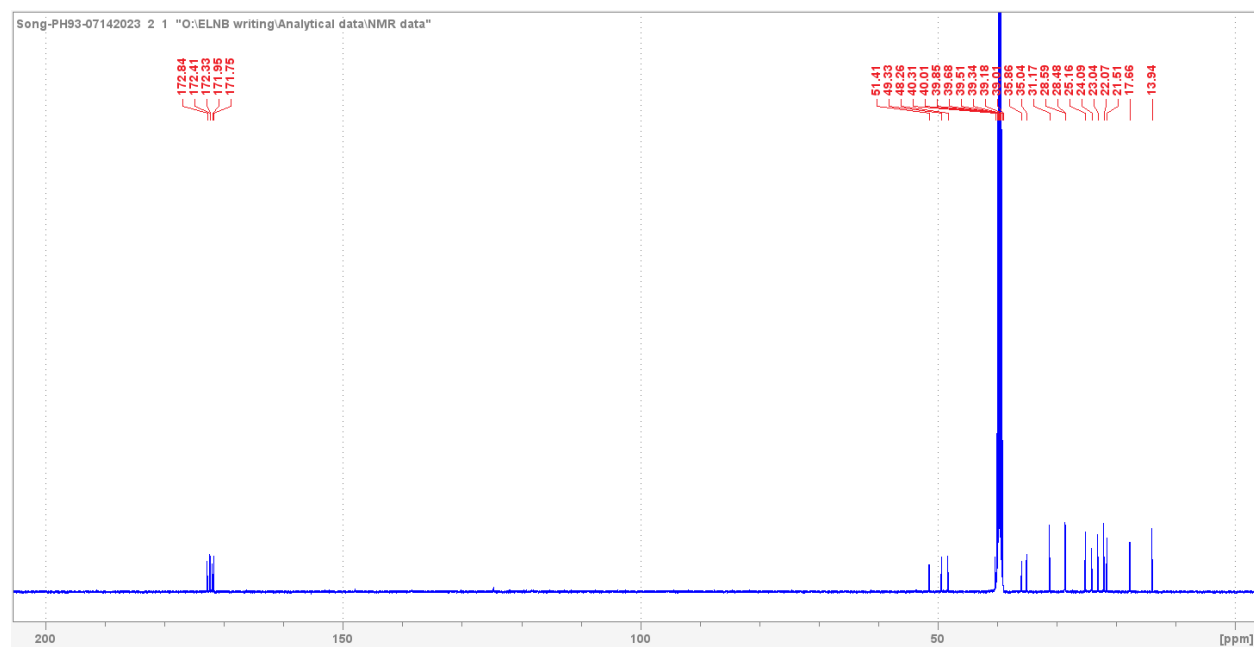

**Figure S17:**  $^{13}\text{C}$  NMR of compound **11** in DMSO- $d_6$ .

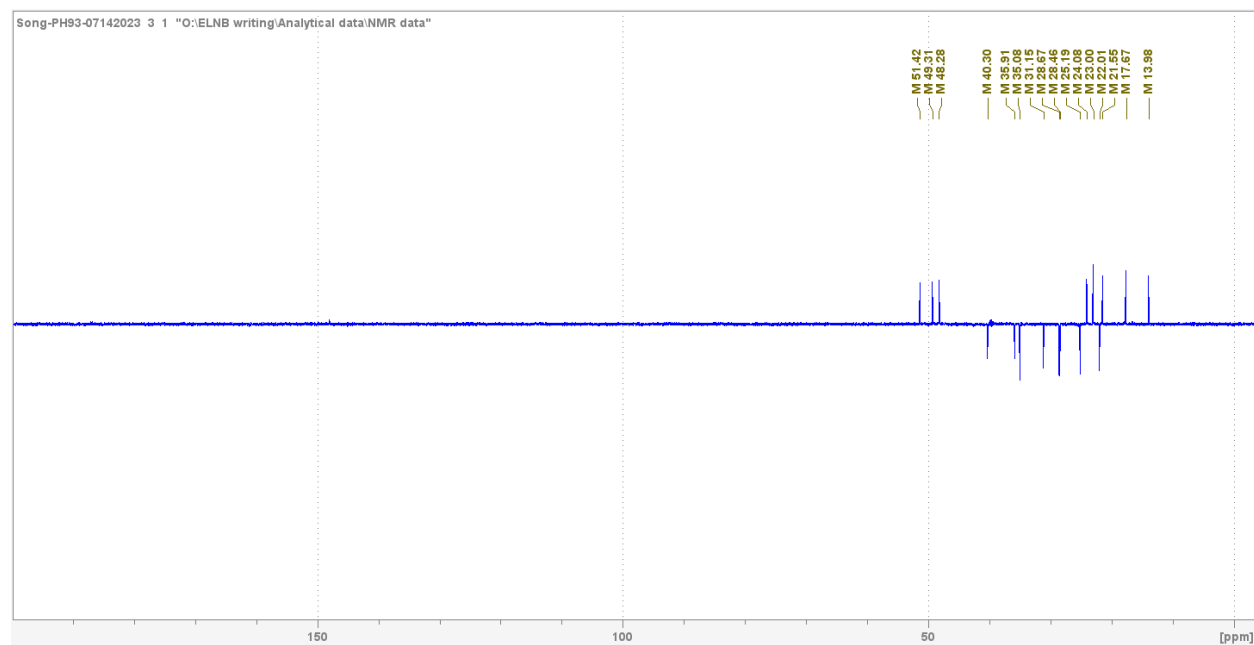

**Figure S18:**  $^{13}\text{C}$  DEPT NMR of compound **11** in DMSO- $d_6$ .

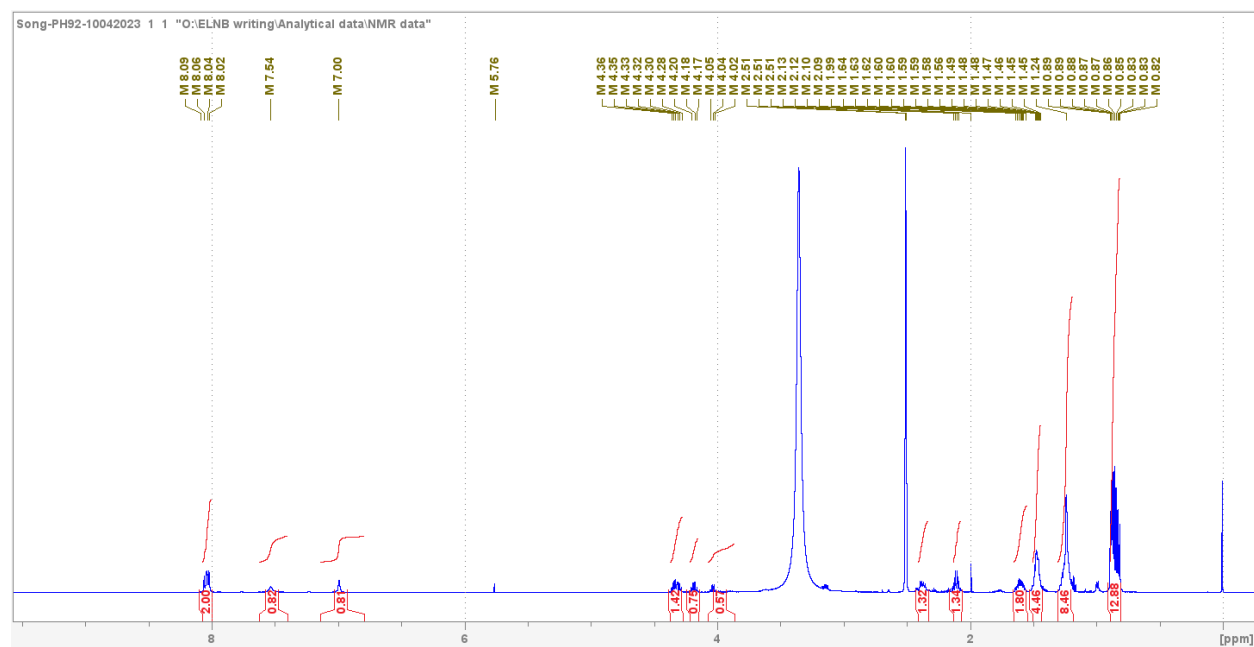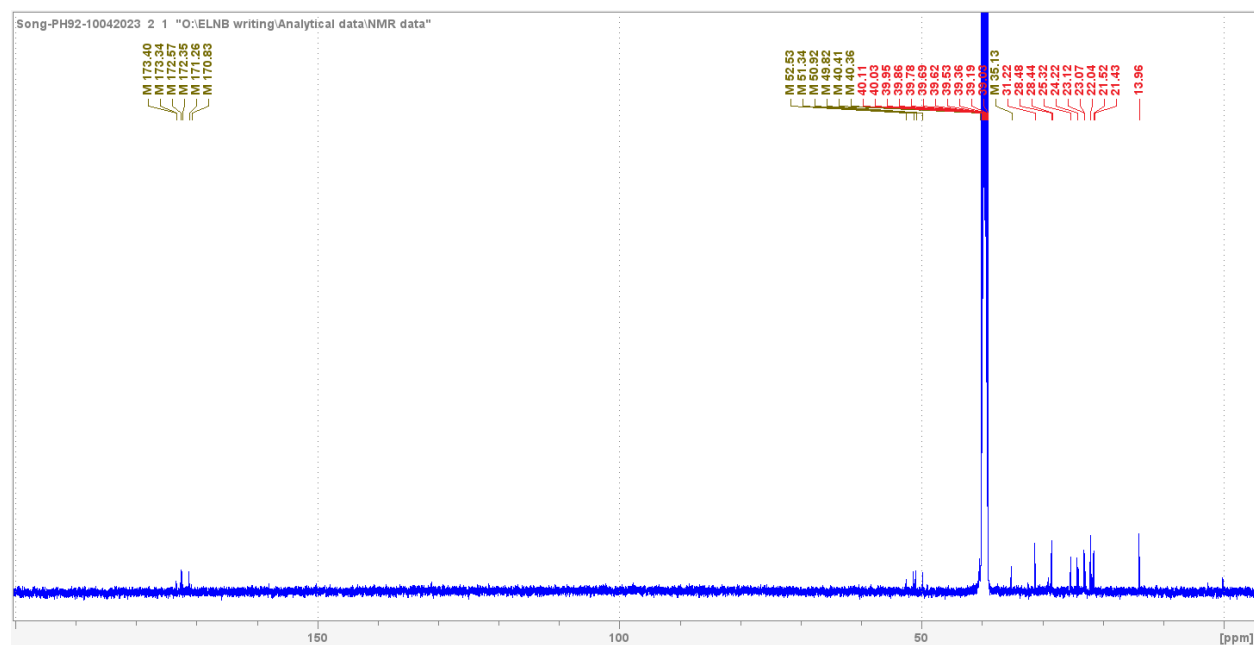

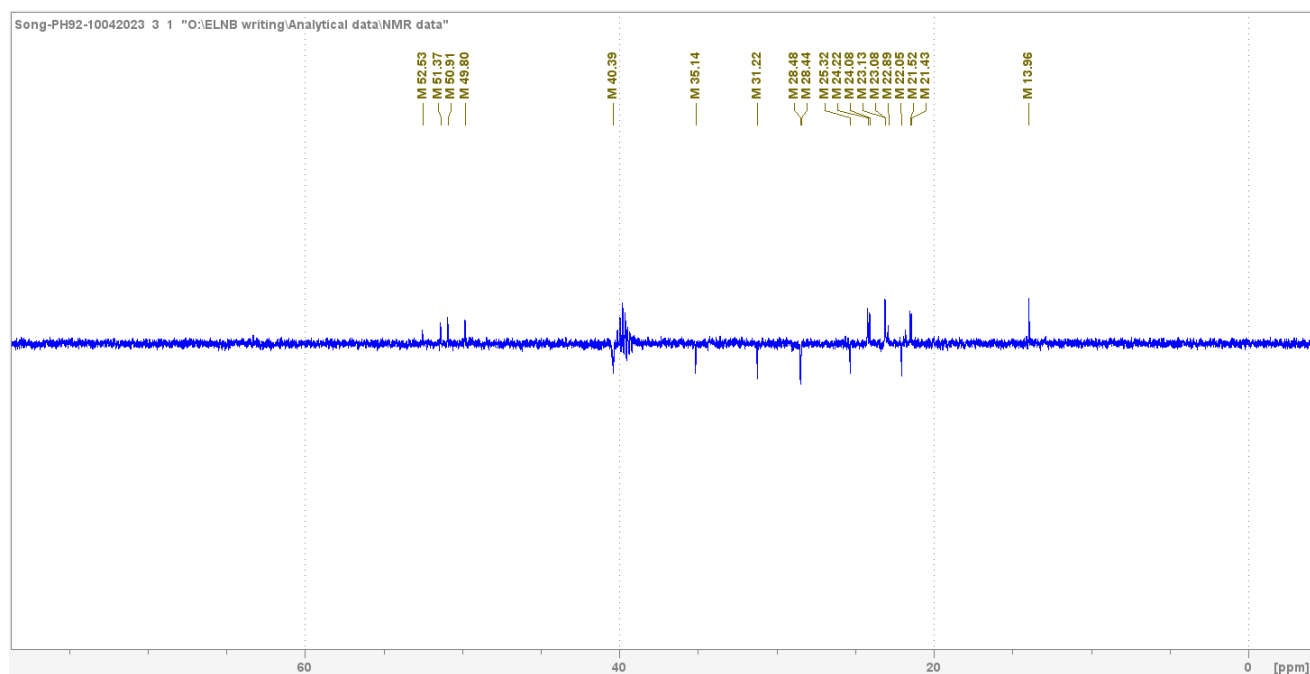

**Figure S21:**  $^{13}\text{C}$  DEPT NMR of compound **12** (PH91) in DMSO- $d_6$ .

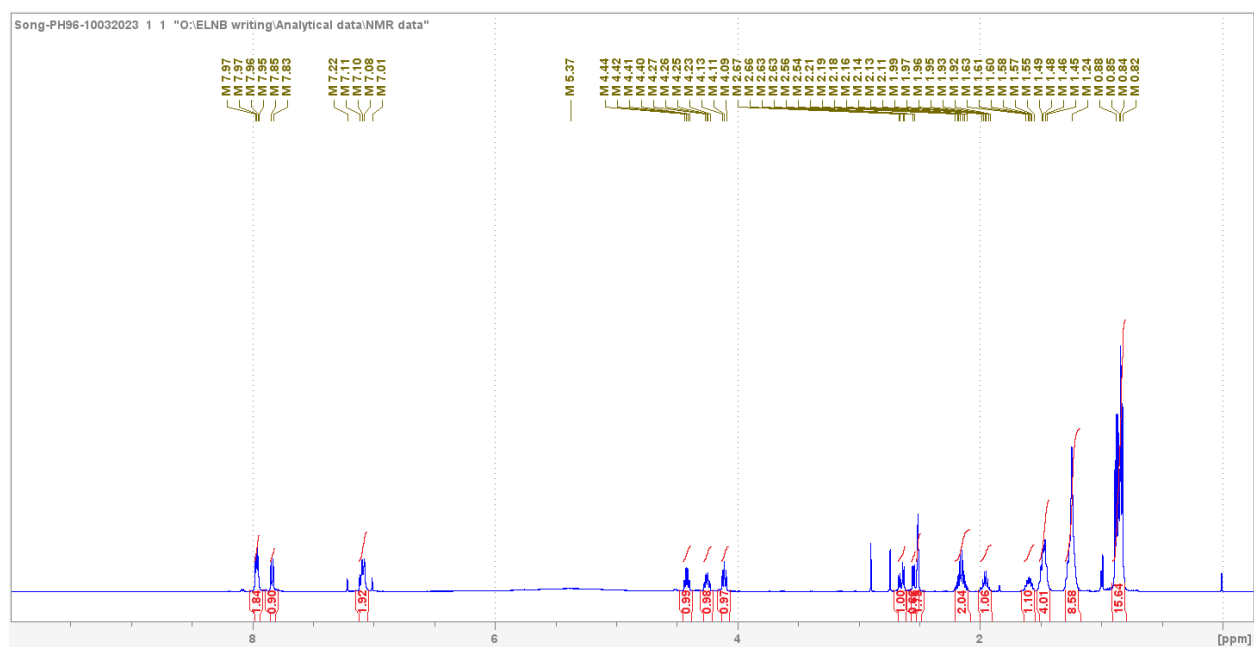

**Figure S22:**  $^1\text{H}$  NMR of compound **13** in DMSO- $d_6$ .

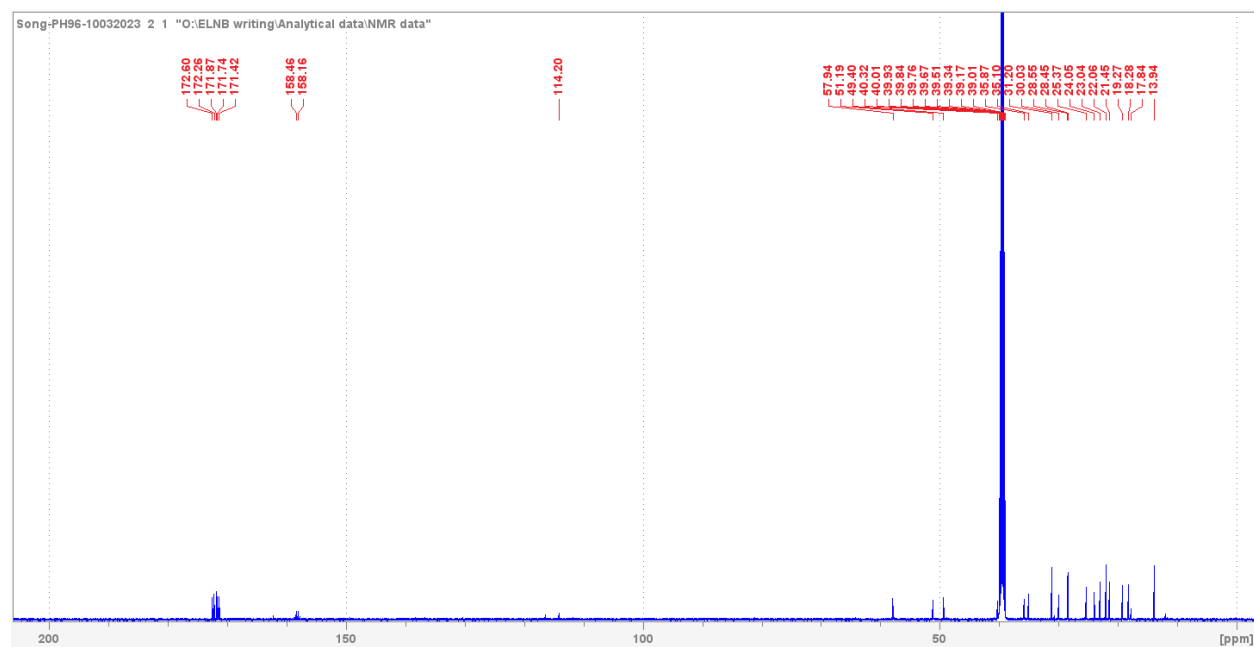

**Figure S23:**  $^{13}\text{C}$  NMR of compound **13** in DMSO- $d_6$ .

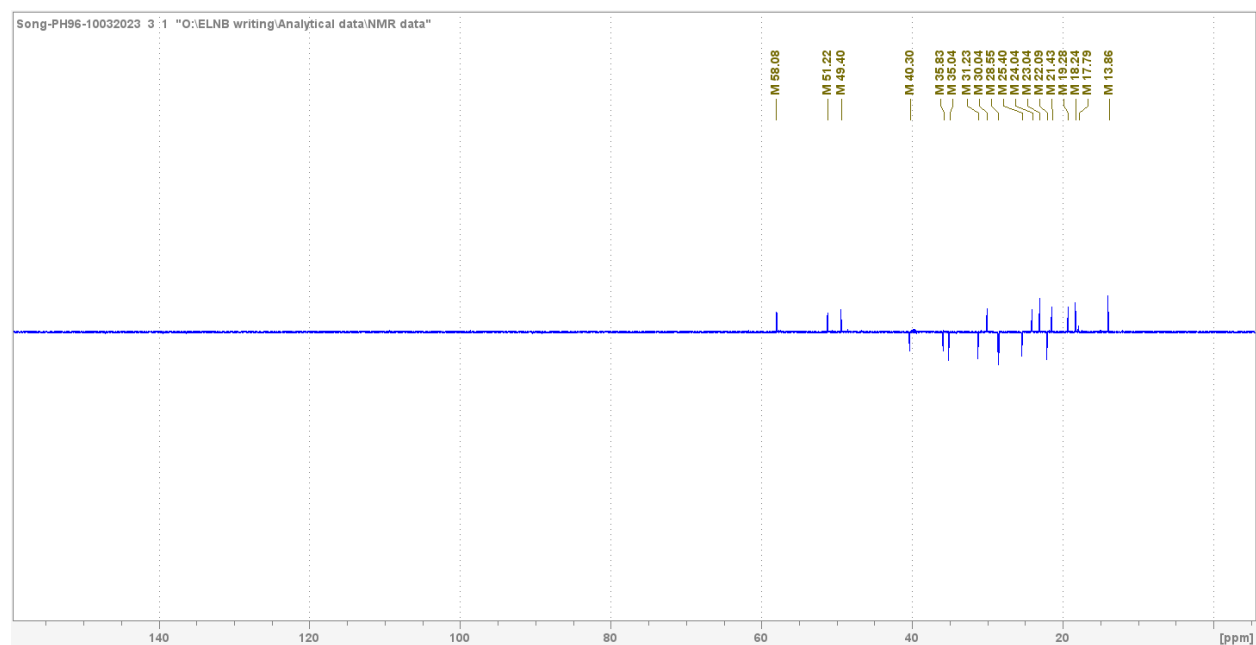

**Figure S24:**  $^{13}\text{C}$  DEPT NMR of compound **13** in DMSO- $d_6$ .

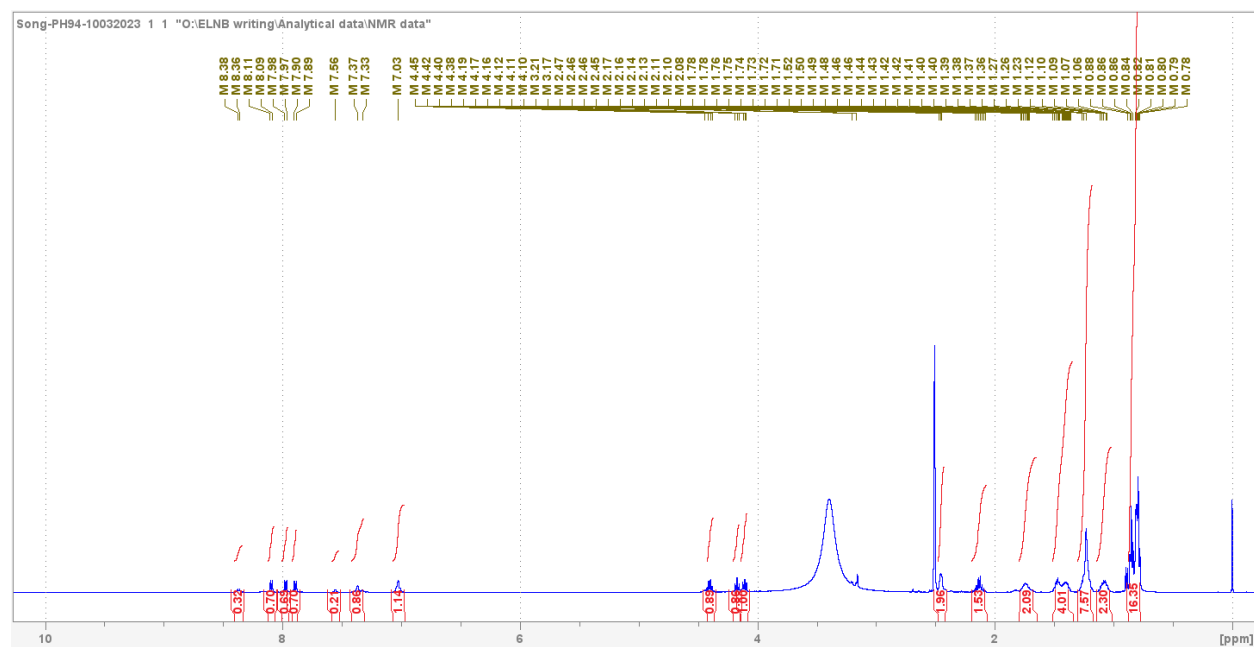

**Figure S25:**  $^1\text{H}$  NMR of compound 14 in DMSO- $d_6$ .

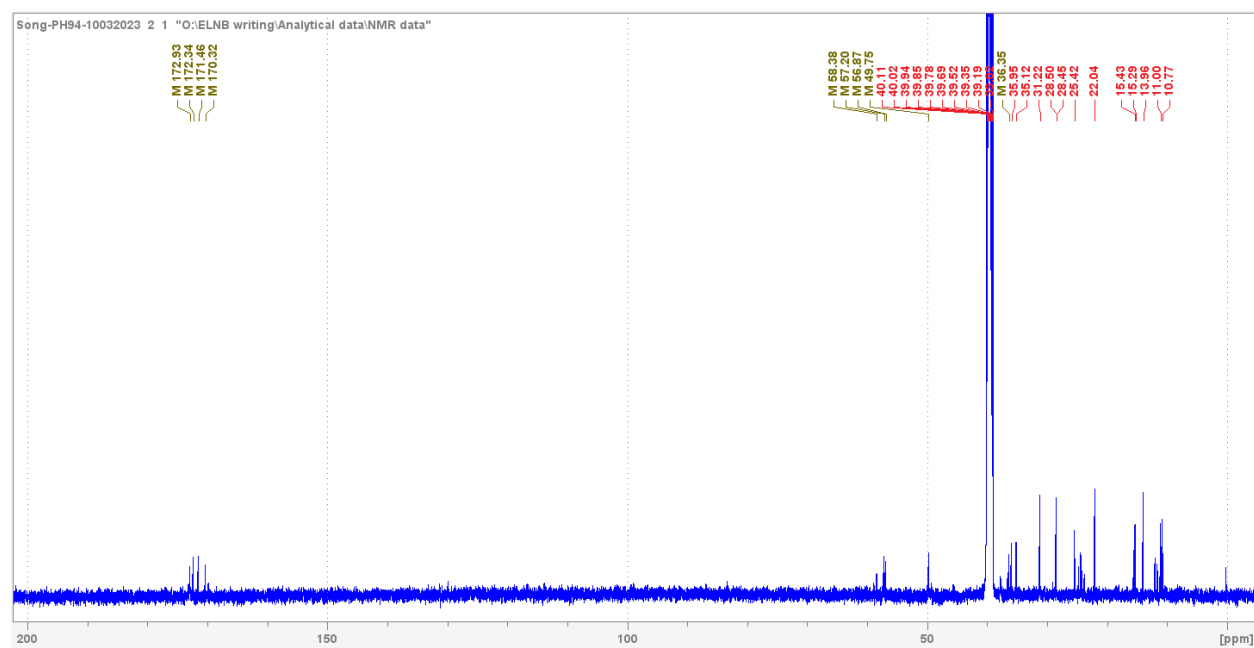

**Figure S26:**  $^{13}\text{C}$  NMR of compound 14 in DMSO- $d_6$ .

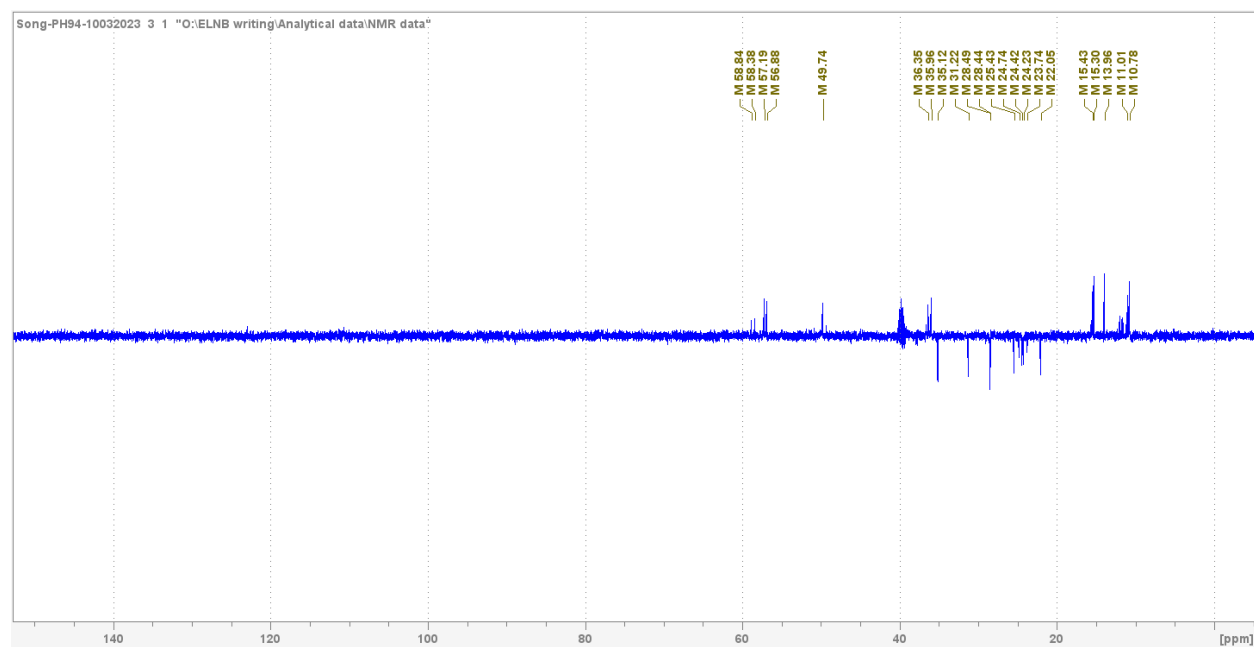

**Figure S27:**  $^{13}\text{C}$  DEPT NMR of compound **14** in DMSO- $d_6$ .
